# Supplementary material for: In vivo photoacoustic image-guided tumor photothermal therapy and real-time temperature monitoring using a core–shell polypyrrole@CuS nanohybrid
Source: Royal Society of Chemistry journal article supplement (doi:10.1039/d2nr02848d), 2022-01-01
Supplement: d2nr02848d1.pdf [file d2nr02848d1.pdf]

## Supporting information

### In vivo photoacoustic image-guided tumor photothermal therapy and real-time temperature monitoring using a core-shell polypyrrole@CuS nanohybrid

Yang Cao,\* Ziqun Chen, and Haitao Ran

Chongqing Key Laboratory of Ultrasound Molecular Imaging, Institute of ultrasound  
imaging, Second Affiliated Hospital, Chongqing Medical University, Chongqing,  
400010, P. R. China.

\*Corresponding author:

Yang Cao: E-mail: yangcao@cqmu.edu.cn

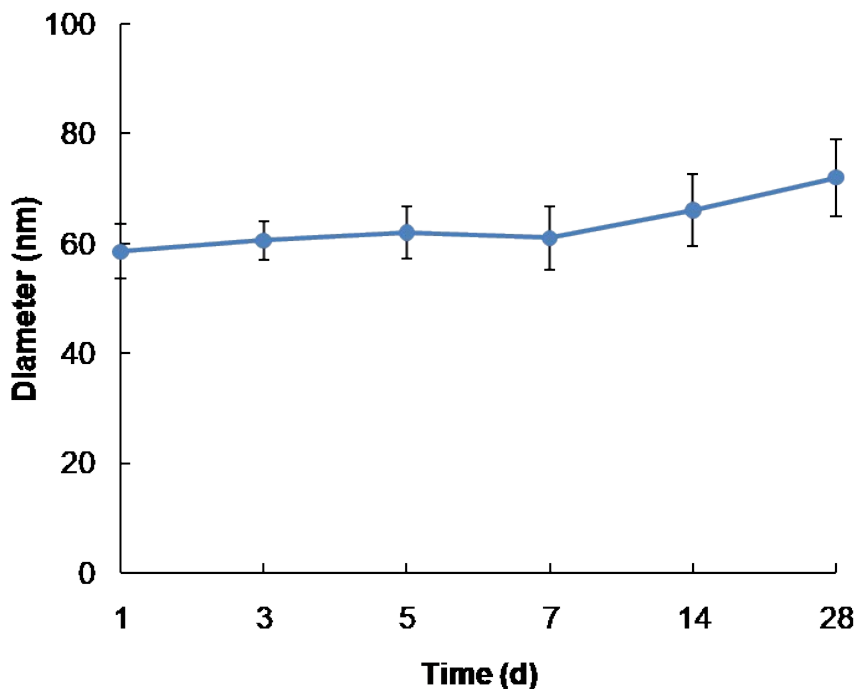

Fig.S1 Diameter of polypyrrole@CuS nanohybrid in 28 days

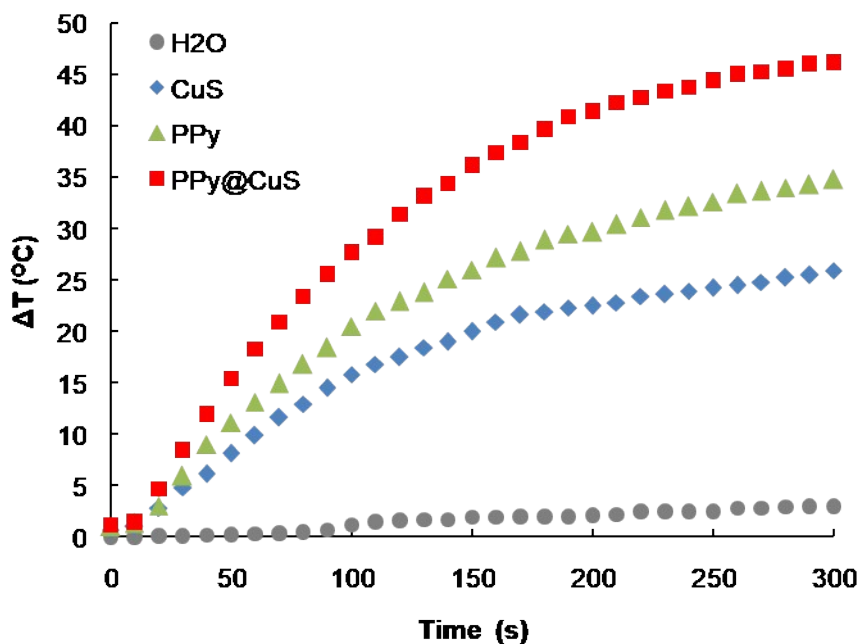

Fig.S2 Temperature elevation of PPy@CuS NPs and CuS, PPy NPs aqueous dispersions under 2 W 808 nm NIR laser irradiation for 300 s.

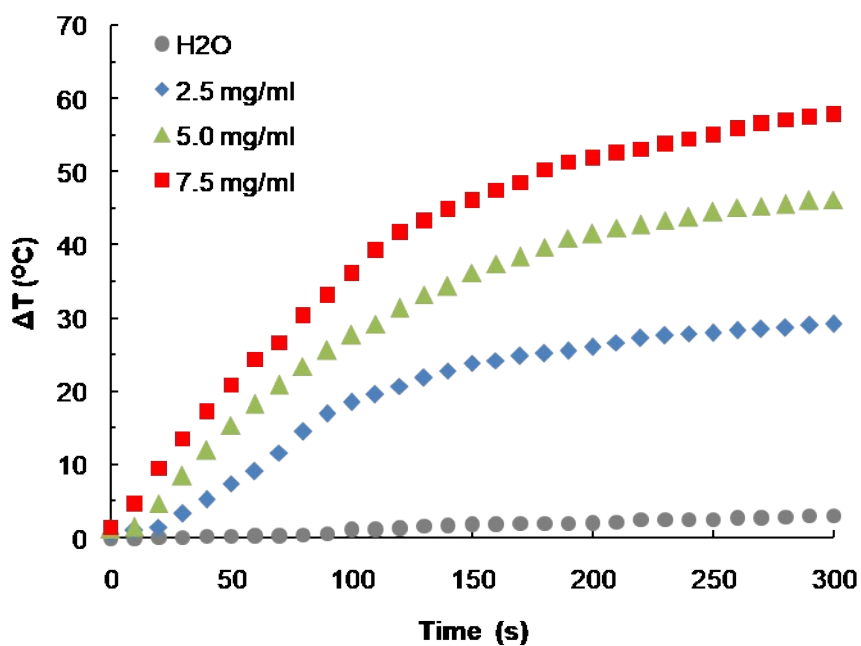

Fig.S3 Temperature elevation of PPy@CuS NPs aqueous dispersions with different concentrations under 2 W 808 nm NIR laser irradiation for 300s.

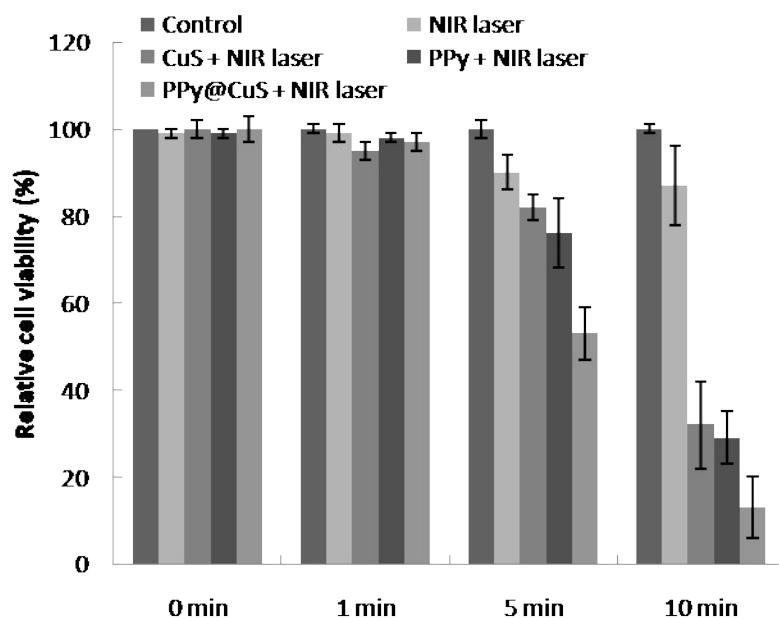

Fig.S4 Relative cell viability of MDA-MB-231 cells co-incubated with different NPs under 808 nm laser (2W) irradiation for 0-10 mins.

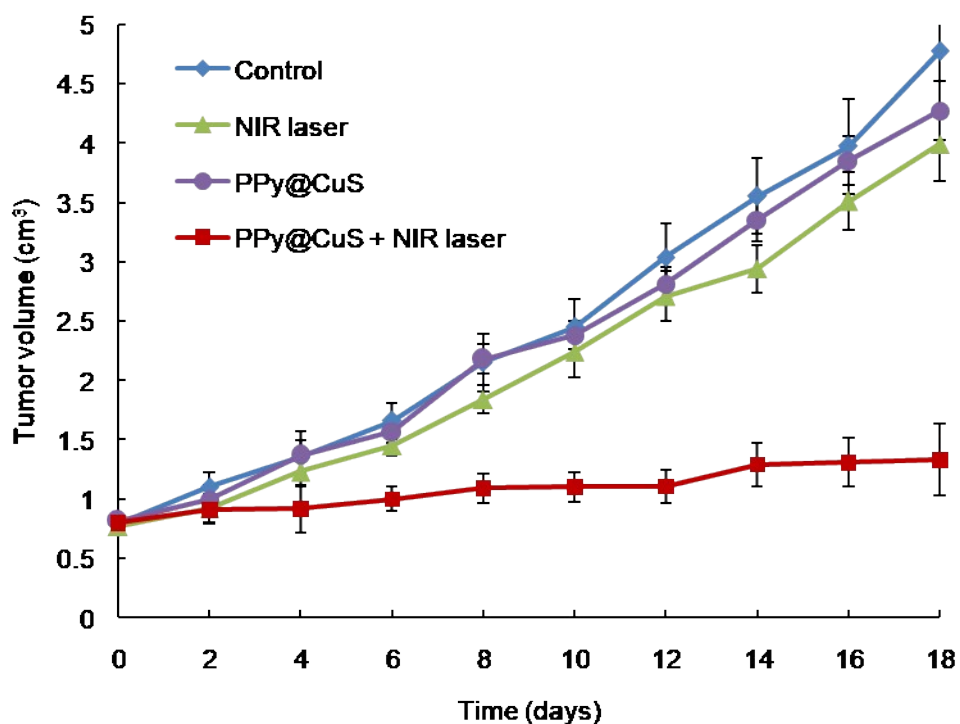

Fig.S5 Tumor-volume curves after the injection of PPy@CuS NPs followed by NIR laser irradiation in vivo

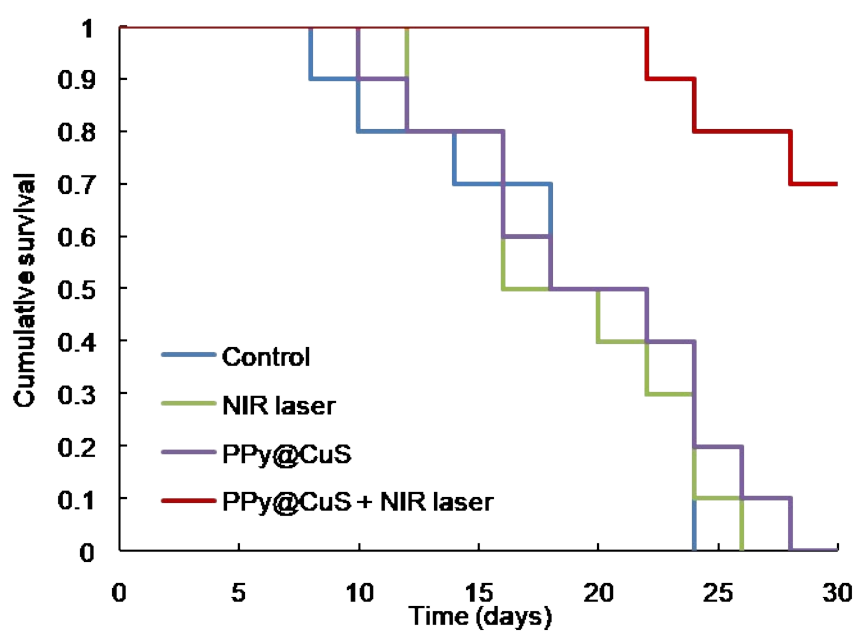

Fig.S6 Cumulative survival of animals after intravenous administration of PPy@CuS NPs and NIR laser irradiation
